# Supplementary material for: Superior lithium-storage properties derived from a high pseudocapacitance behavior for a peony-like holey Co3O4 anode
Source: Royal Society of Chemistry journal article supplement (doi:10.1039/c9ta00294d), 2019-01-01
Supplement: c9ta00294d1.pdf [file c9ta00294d1.pdf]

## Supporting Information for

### Superior lithium-storage properties derived from a high pseudocapacitance behavior for a peony-like holey $\text{Co}_3\text{O}_4$ anode

Huanhuan Duan,<sup>ab</sup> Li Du,<sup>ab</sup> Shenkui Zhang,<sup>ab</sup> Zhuowen Chen,<sup>ab</sup> and Songping Wu<sup>\*ab</sup>

*a*- School of Chemistry and Chemical Engineering, South China University of Technology, Guangzhou, 510641, China.

*b*- Guangdong Key Laboratory of Fuel Cell Technology, Guangzhou, 510641, China.

\*Corresponding author, E-mail: [chwsp@scut.edu.cn](mailto:chwsp@scut.edu.cn)

#### Experimental section:

High and low temperature electrochemical performances were tested in a voltage range from 0.01-3.0 V with a digital-controlled oven (80 °C, Keelrein, Shanghai, China) and a refrigerator (-25 °C, SIEMENS, Germany), respectively.

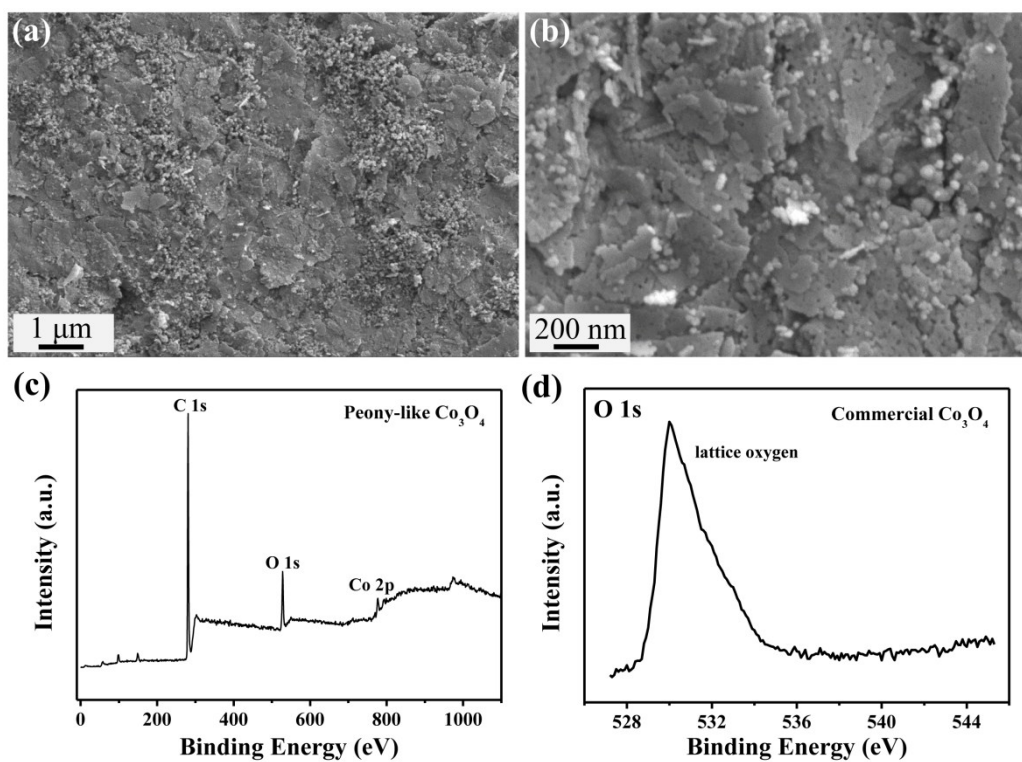

**Figure S1.** (a, b) SEM images of peony-like  $\text{Co}_3\text{O}_4$  electrode after calendaring; (c) XPS survey spectrum of peony-like  $\text{Co}_3\text{O}_4$ ; (d) O 1s XPS spectrum of commercial  $\text{Co}_3\text{O}_4$ .

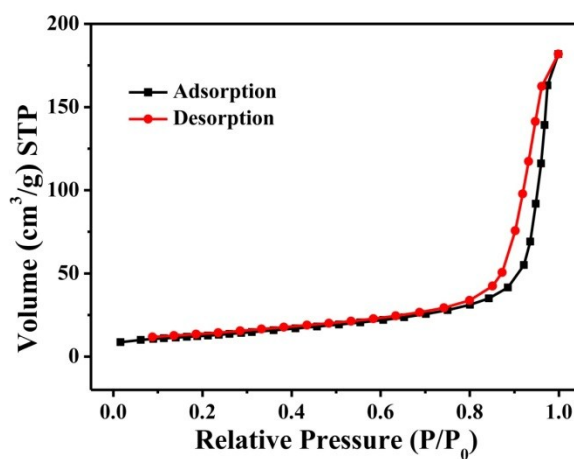

**Figure S2.** The nitrogen adsorption-desorption isotherms of  $\text{Co}_3\text{O}_4$ .

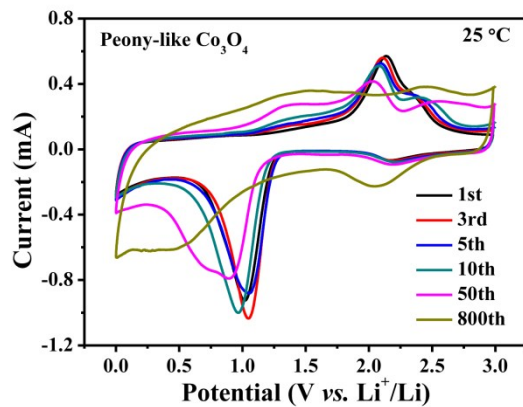

**Figure S3.** Cyclic voltammetry curves of peony-like  $\text{Co}_3\text{O}_4$  at a scan rate of  $0.5\text{ mV s}^{-1}$  with a current density of  $500\text{ mA g}^{-1}$  after different cycles.

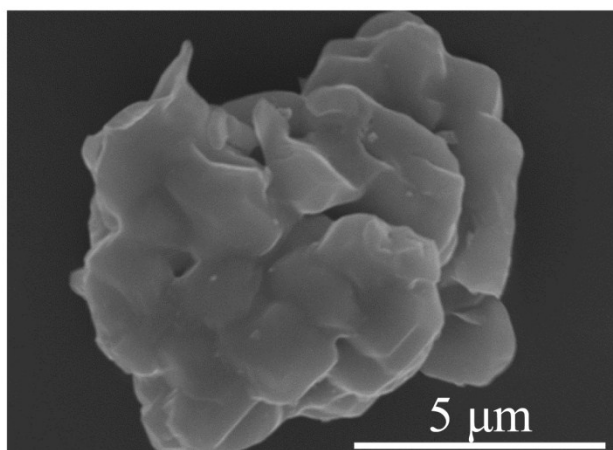

**Figure S4.** SEM image of commercial  $\text{Co}_3\text{O}_4$  material.

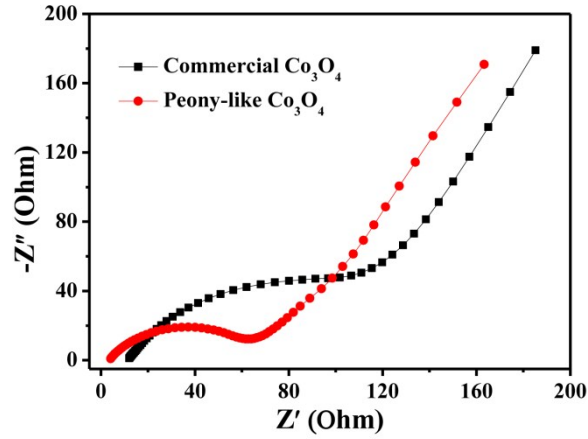

**Figure S5.** EIS profiles of peony-like  $\text{Co}_3\text{O}_4$  and commercial  $\text{Co}_3\text{O}_4$  electrode.

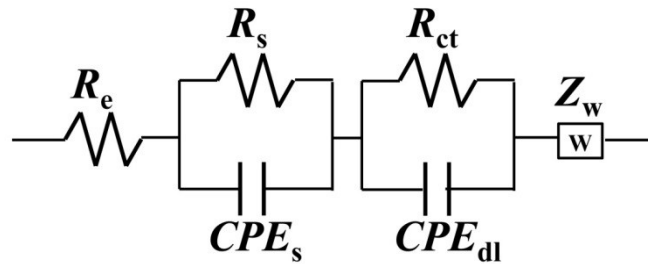

**Figure S6.** The equivalent circuit diagram of simulating peony-like  $\text{Co}_3\text{O}_4$  and commercial  $\text{Co}_3\text{O}_4$  electrodes assembled in coin cells. ( $R_e$  is electrolyte resistance,  $R_s$  is SEI layer resistance,  $R_{ct}$  is charge transfer resistance,  $CPE_s$  is surface films capacitance,  $CPE_{dl}$  is double-layer capacitance,  $Z_w$  is Warburg impedance.)

**Table S1.** Fitted kinetic parameters of peony-like  $\text{Co}_3\text{O}_4$  and commercial  $\text{Co}_3\text{O}_4$  electrodes, respectively.

| Sample                                       | $R_e(\Omega)$ | $R_s(\Omega)$ | $R_{ct}(\Omega)$ |
|----------------------------------------------|---------------|---------------|------------------|
| Peony-like $\text{Co}_3\text{O}_4$ electrode | 4.40          | 5.90          | 61.02            |
| Commercial $\text{Co}_3\text{O}_4$ electrode | 4.84          | 5.86          | 118.23           |

**Table S2.** Fitted kinetic parameters of peony-like  $\text{Co}_3\text{O}_4$  electrode at a current density of  $500 \text{ mA g}^{-1}$  after different cycles.

| Cycle Number     | 1st   | 3rd   | 5th   | 10th  | 50th  | 800th |
|------------------|-------|-------|-------|-------|-------|-------|
| $R_e(\Omega)$    | 4.40  | 4.39  | 4.80  | 4.5   | 5.01  | 15.23 |
| $R_s(\Omega)$    | 5.90  | 5.43  | 4.32  | 5.11  | 5.35  | 5.50  |
| $R_{ct}(\Omega)$ | 61.02 | 43.21 | 44.72 | 45.76 | 45.31 | 27.21 |

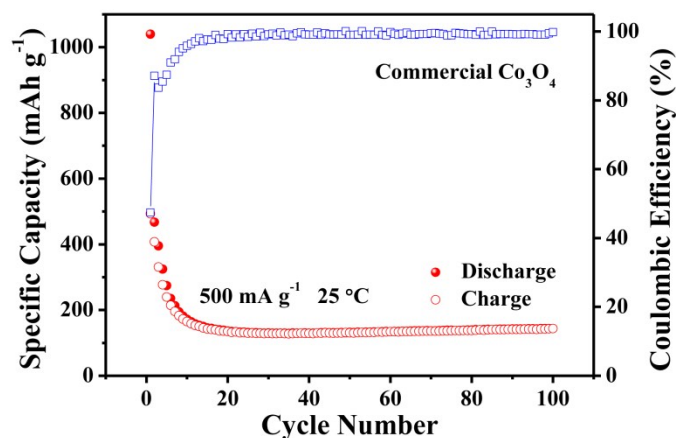

**Figure S7.** Cycle performance of commercial  $\text{Co}_3\text{O}_4$  electrode at a current density of  $500 \text{ mA g}^{-1}$ .

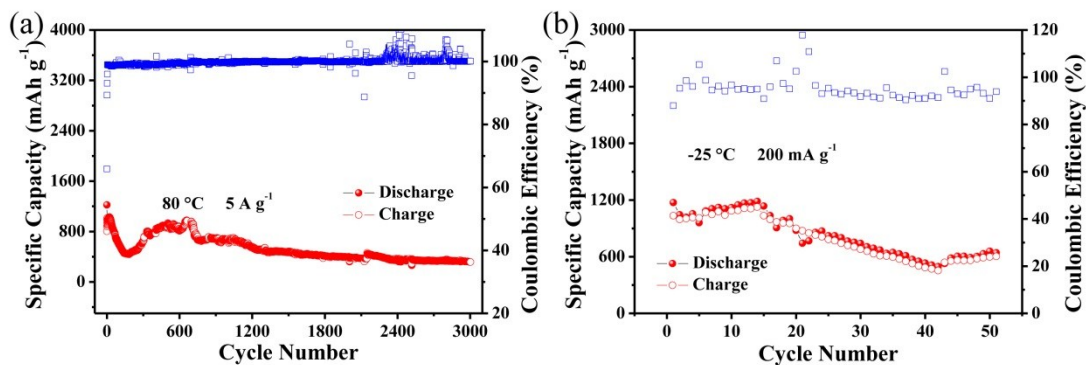

**Figure S8.** Electrochemical performances of peony-like  $\text{Co}_3\text{O}_4$  at (a)  $80 \text{ }^\circ\text{C}$  ( $@1 \text{ A g}^{-1}$ ); (b)  $-25 \text{ }^\circ\text{C}$  ( $@200 \text{ mA g}^{-1}$ ).

The results of high-temperature lithium-storage capability of peony-like  $\text{Co}_3\text{O}_4$  electrode were shown in **Figure S8a**. The peony-like  $\text{Co}_3\text{O}_4$  electrode achieved a first discharge capacity of  $1220.9 \text{ mA h g}^{-1}$  at a current density of  $5.0 \text{ A g}^{-1}$  under  $80 \text{ }^\circ\text{C}$ , with an initial Coulombic efficiency of 65.9%. After 3000 cycles, a stable reversible capacity of  $315.5 \text{ mA h g}^{-1}$  was retained, which showed that this peony-like  $\text{Co}_3\text{O}_4$  electrode possessed a good cycling stability under high temperature at a large current density. In addition, we also attempted to check the feasibility of as-prepared material as electrode under low temperature ( $-25 \text{ }^\circ\text{C}$ ). As shown in **Figure S8b**, it is necessary to point out that the electrode rendered an initial discharge capacity of  $1173 \text{ mA h g}^{-1}$  at a current density of  $200 \text{ mA g}^{-1}$ , with a high Coulombic efficiency of 87%. After running 50 cycles, this electrode delivered a reversible capacity of  $642 \text{ mA h g}^{-1}$  with an average Coulombic efficiency of 95%, which can be ascribed to slow ion diffusion under low temperature.

**Table S3.** Electrochemical performances and physical parameters of cobalt oxide-based anode materials.

| Morphology                                           | Synthesis method                  | Current rate ( $\text{mA g}^{-1}$ ) | Temperature ( $^\circ\text{C}$ ) | Cycle number | Capacity ( $\text{mAh g}^{-1}$ )  | Ref. |
|------------------------------------------------------|-----------------------------------|-------------------------------------|----------------------------------|--------------|-----------------------------------|------|
| Hierarchical CNT/ $\text{Co}_3\text{O}_4$ microtubes | chemical transformation/annealing | 1000                                | 25                               | 200          | 782                               | 1    |
|                                                      |                                   | 4000                                |                                  |              | 577                               |      |
| $\text{Co}_3\text{O}_4$ hexagonal plates             | solvothermal method               | 350                                 | 25                               | 50           | 671 $\text{Co}_3\text{O}_4$ -EtOH | 2    |
|                                                      |                                   |                                     |                                  |              | 485 $\text{Co}_3\text{O}_4$ -MeOH |      |
|                                                      |                                   |                                     |                                  |              | 350 $\text{Co}_3\text{O}_4$ -IPA  |      |
|                                                      |                                   |                                     |                                  |              | 829 $\text{Co}_3\text{O}_4$ -TT   |      |
| $\text{Co}_3\text{O}_4$ hollow spheres               | solution-based method             | 1000                                | 25                               | 100          | 1058                              | 3    |
| Hollow                                               | Electrodeposition                 | 500                                 | 25                               | 100          | 1048                              | 4    |

|                                                                 |                                               |              |           |             |              |      |  |
|-----------------------------------------------------------------|-----------------------------------------------|--------------|-----------|-------------|--------------|------|--|
| Co <sub>3</sub> O <sub>4</sub> /carbon nanosheet composites     | on/annealing                                  |              |           |             |              |      |  |
| Co <sub>3</sub> O <sub>4</sub> hollow sphere                    | solvothermal method                           | 1000         |           |             | 924          |      |  |
|                                                                 |                                               | 5000         | 25        | 500         | 335          | 5    |  |
|                                                                 |                                               | 5000         |           | 6000        | 219          |      |  |
| Shale-like Co <sub>3</sub> O <sub>4</sub>                       | annealing                                     | 200          | 25        | 100         | 1045.3       | 6    |  |
| Carbon-doped Co <sub>3</sub> O <sub>4</sub> hollow nanofibers   | electrospinning technique/hydrothermal method | 200          | 25        | 100         | 1121         | 7    |  |
| Co <sub>3</sub> O <sub>4</sub> nanosheets                       | hydrothermal reactions/heat treatment process | 200          | 25        | 100         | 1029         | 8    |  |
| Bowknot-like Co <sub>3</sub> O <sub>4</sub>                     | hydrothermal method/calcination               | 178          |           | 1           | 1427.9       |      |  |
|                                                                 |                                               | 178          | 25        | 100         | 1388.8       | 9    |  |
|                                                                 |                                               | 1780         |           | 500         | 751.3        |      |  |
| N-doped 3D mesoporous Co <sub>3</sub> O <sub>4</sub> network    | dipping process/annealing                     | 200          |           | 200         | 957          |      |  |
|                                                                 |                                               | 5000         | 25        | 700         | 485          | 10   |  |
| Co <sub>3</sub> O <sub>4</sub> /Ag composite                    | dealloying method                             | 1000         | 25        | 1000        | 468.5        | 11   |  |
| Two-dimensional holey Co <sub>3</sub> O <sub>4</sub> nanosheets | template-directed strategy                    | 1000         | 25        | 200         | 850          | 12   |  |
| Peony-like holey Co <sub>3</sub> O <sub>4</sub>                 | solvothermal method                           | <u>500</u>   | <u>25</u> | <u>800</u>  | <u>1880</u>  |      |  |
|                                                                 |                                               | <u>10000</u> | <u>25</u> | <u>1000</u> | <u>341.4</u> | This |  |
|                                                                 |                                               | <b>5000</b>  | <b>80</b> | <b>3000</b> | <b>315.5</b> | work |  |

**Table S4.** The percentages of capacitive-effect contribution under different temperatures (-25, 25, 80 °C) with a series of sweep rates of 0.1, 0.3, 0.5, 1.0, 1.5 mV s<sup>-1</sup>, respectively.

| T/°C | $\nu/\text{mV s}^{-1}$ |       |       |       |       |       |
|------|------------------------|-------|-------|-------|-------|-------|
|      |                        | 0.1   | 0.3   | 0.5   | 1.0   | 1.5   |
| -25  |                        | 25.0% | 30.1% | 36.0% | 50.7% | 57.2% |
| 25   |                        | 54.5% | 63.2% | 68.7% | 77.9% | 83.5% |
| 80   |                        | 57.1% | 66.6% | 74.7% | 84.0% | 90.0% |

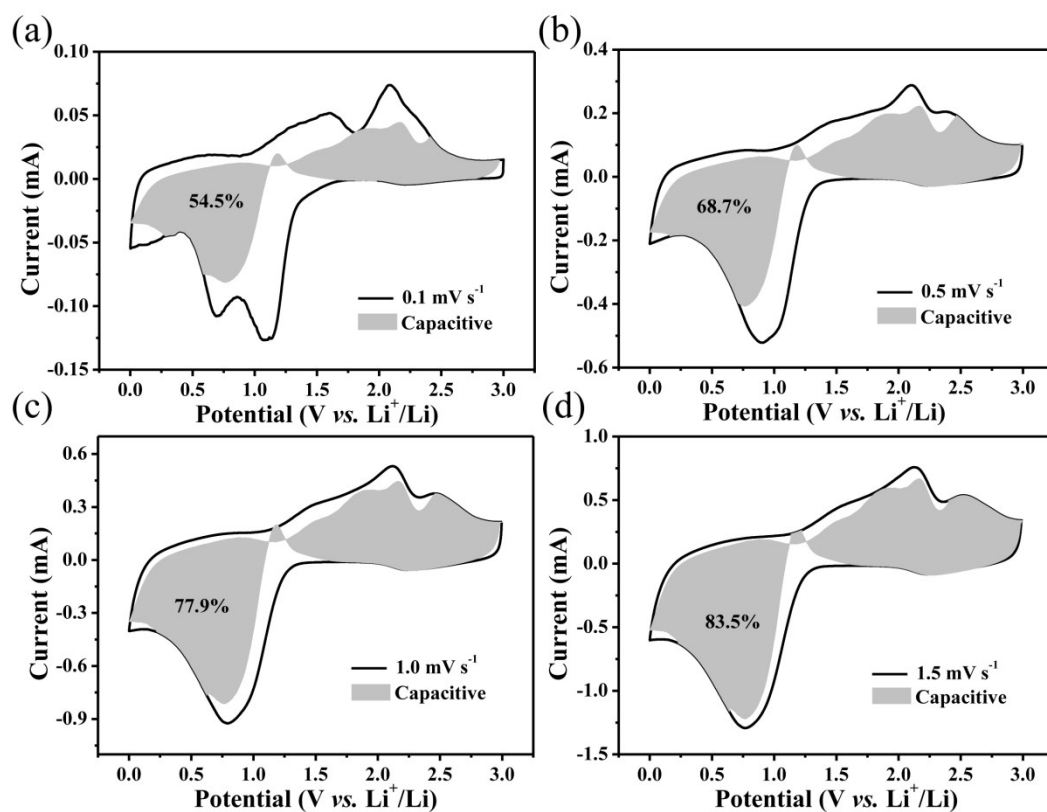

**Figure S9.** Capacitive contribution (shadow area) to total lithium-storage capacity at sweep rates of (a) 0.1 mV s<sup>-1</sup>, (b) 0.5 mV s<sup>-1</sup>, (c) 1.0 mV s<sup>-1</sup>, (d) 1.5 mV s<sup>-1</sup> under 25



°C.

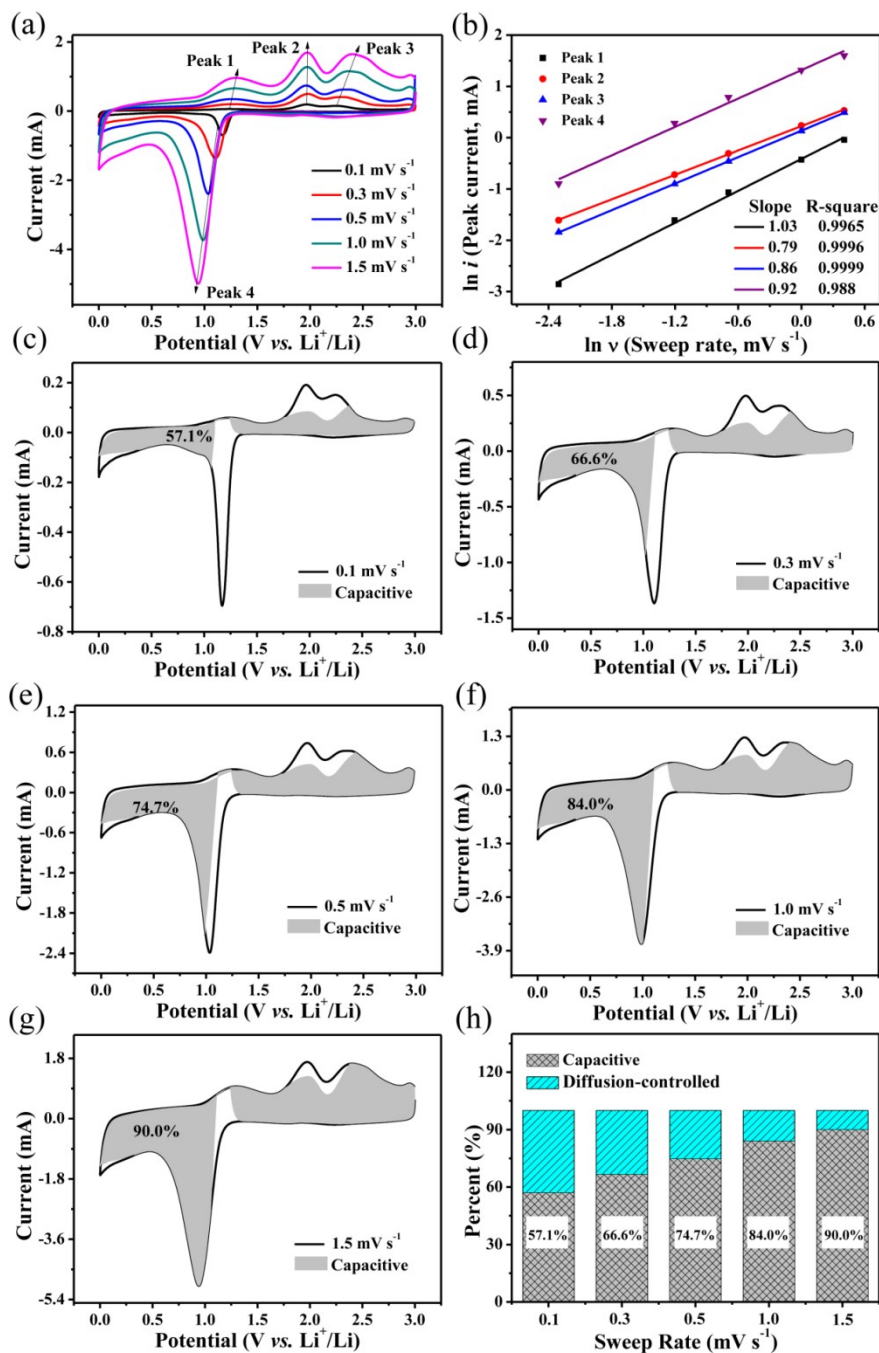

**Figure S10.** (a) CV curves after first three discharge/charge cycles with different sweep rates at 80 °C; (b)  $\ln(i_{\text{peak}})$  versus  $\ln(v_{\text{sweep}})$  of four peaks (marked as 1-4 in (a)), and where fitted-line slope is b-value (There is a perfect fitting degree due to the value of R-square is close to ~1.); Capacitive contribution (shadow area) to total lithium-storage capacity at sweep rates of (c) 0.1 mV s<sup>-1</sup>, (d) 0.3 mV s<sup>-1</sup>,

(e)  $0.5 \text{ mV s}^{-1}$ , (f)  $1.0 \text{ mV s}^{-1}$ , (g)  $1.5 \text{ mV s}^{-1}$ ; (h) The percentages of capacitive-effect contribution at different sweep rates of 0.1, 0.3, 0.5, 1.0, and  $1.5 \text{ mV s}^{-1}$ .

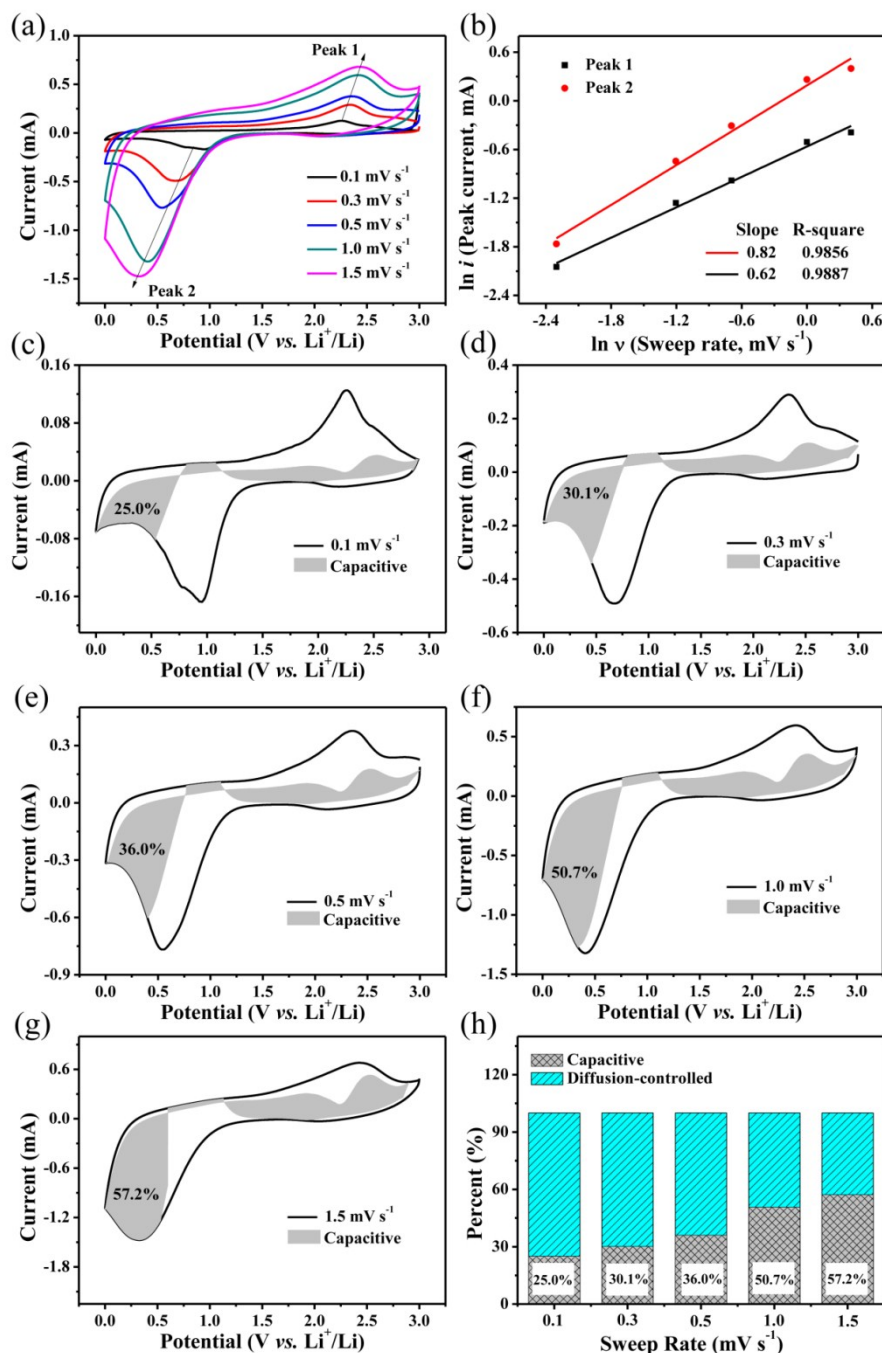

**Figure S11.** (a) CV curves after first three discharge/charge cycles with different sweep rates at  $-25 \text{ }^\circ\text{C}$ ; (b)  $\ln(i, \text{ peak current})$  versus  $\ln(v, \text{ sweep rate})$  of two peaks (marked as 1-2 in (a)), and where fitted-line slope is b-value (There is a perfect fitting degree due to the value of R-square is close to  $\sim 1$ .); Capacitive contribution (shadow area) to total lithium-storage capacity at sweep rates of (c)  $0.1 \text{ mV s}^{-1}$ , (d)  $0.3 \text{ mV s}^{-1}$ , (e)  $0.5 \text{ mV s}^{-1}$ , (f)  $1.0 \text{ mV s}^{-1}$ , (g)  $1.5 \text{ mV s}^{-1}$ ; (h) The percentages of capacitive-effect contribution at different sweep rates of 0.1, 0.3, 0.5, 1.0, and  $1.5 \text{ mV s}^{-1}$ .

contribution at different sweep rates of 0.1, 0.3, 0.5, 1.0, and 1.5 mV s<sup>-1</sup>.

#### References:

- 1 Y. M. Chen, L. Yu and X. W. Lou, *Angew. Chem. Int. Ed.*, 2016, **55**, 5990-5993.
- 2 W. Zhao, X. Zhou, I. J. Kim and S. Kim, *Nanoscale*, 2017, **9**, 940-946.
- 3 J. Z. Yin, Y. Zhang, Q. Y. Lu, X. L. Wu, Z. J. Jiang, L. Y. Dang, H. F. Ma, Y. Y. Guo, F. Gao and Q. Y. Yan, *J. Mater. Chem. A*, 2017, **5**, 12757-12761.
- 4 L. Peng, Y. Y. Feng, Y. J. Bai, H. J. Qiu and Y. Wang, *J. Mater. Chem. A*, 2015, **3**, 8825-8831.
- 5 H. Sun, G. Xin, T. Hu, M. Yu, D. Shao, X. Sun and J. Lian, *Nat. Commun.*, 2014, **5**, 4526.
- 6 H. H. Li, Z. Y. Li, X. L. Wu, L. L. Zhang, C. Y. Fan, H. F. Wang, X. Y. Li, K. Wang, H. Z. Sun and J. P. Zhang, *J. Mater. Chem. A*, 2016, **4**, 8242-8248.
- 7 G. C. Chunshuang Yan , Xin Zhou , Jingxue Sun , and Chade Lv, *Adv. Funct. Mater.*, 2016, **26**, 1428-1436.
- 8 D. Zhang, W. Sun, Z. Chen, Y. Zhang, W. Luo, Y. Jiang and S. X. Dou, *Chemistry*, 2016, **22**, 18060-18065.
- 9 H. R. Du, C. Yuan, K. F. Huang, W. H. Wang, K. Zhang and B. Y. Geng, *J. Mater. Chem. A*, 2017, **5**, 5342-5350.
- 10 S. Zhu, J. J. Li, X. Y. Deng, C. N. He, E. Z. Liu, F. He, C. S. Shi and N. Q. Zhao, *Adv. Funct. Mater.*, 2017, **27**, 1605017.
- 11 Q. Hao, Y. Yu, D. Y. Zhao and C. X. Xu, *J. Mater. Chem. A*, 2015, **3**, 15944-15950.
- 12 D. H. Chen, L. L. Peng, Y. F. Yuan, Y. Zhu, Z. W. Fang, C. S. Yan, G. Chen, R. Shahbazian-Yassar, J. Lu, K. Amine and G. H. Yu, *Nano Lett.*, 2017, **17**, 3907-3913.
